# Supplementary material for: Bullying and regulation of socio-moral emotions: Adolescent experiences in school contexts.
Source: Research Square preprint supplement (doi:10.21203/rs.3.rs-7926828/v1), 2025-11-12
Supplement: Supplementary file 1 [file 23e3a12ecab80354e2956d79.docx]

**Table 1**

*Data on the people interviewed*

| Identifier | Country (residence) | Sex | Age |
| --- | --- | --- | --- |
| 1Ch | Chile | Male | 11 |
| 2Ch | Chile | Male | 13 |
| 3Ch | Chile | Male | 14 |
| 4Ch | Chile | Female | 12 |
| 5Ch | Chile | Female | 13 |
| 6Ch | Chile | Female | 11 |
| 7Ch | Chile | Male | 12 |
| 8Ch | Chile | Female | 12 |
| 9Ch | Chile | Male | 13 |
| 10Ch | Chile | Female | 13 |
| 11Ch | Chile | Male | 14 |
| 12Ch | Chile | Male | 14 |
| 13C | Cuba | Male | 10 |
| 14C | Cuba | Female | 12 |
| 15C | Cuba | Male | 11 |
| 16C | Cuba | Male | 10 |
| 17C | Cuba | Female | 10 |
| 18C | Cuba | Female | 11 |
| 19C | Cuba | Female | 11 |
| 20C | Cuba | Female | 12 |
| 21C | Cuba | Female | 12 |
| 22C | Cuba | Male | 10 |
| 23C | Cuba | Male | 11 |
| 24C | Cuba | Female | 11 |

**Note:** Identifiers were created for analytical purposes. The number represents the order of the interview, followed by the country of origin code (Ch = Chile; C = Cuba). School names were omitted to preserve the identity of participants and their respective institutions, as well as to avoid any form of stigmatization.

**Table 2**

*Categories and codes emerging from the qualitative coding process*

| **Category** | **Codes** |
| --- | --- |
| Types of roles assumed during bullying | Pro-bullying role |
|  | Passive pro-bullying observer |
|  | Pro-bullying with leadership |
|  | Victim role |
|  | Active victim |
|  | Outsider role |
|  | Prosocial role |
|  | Prosociality with leadership |
|  | Aggressive defender role |
|  | Comforting prosocial role |
|  | Defensive prosocial role |
|  | Prosocial role through mediation |
| Flexible dynamics in the roles assumed during bullying | Alternation between victim and prosocial role |
| Alternation between aggressors and victims |
| Inconsistency in the role assumed as a bystander |
| Perception of variability of aggressors and victims |
| Stable aggressive and prosocial traits | Perception of stable aggressors |
|  | Propensity to be an aggressor |
|  | Propensity to be prosocial |
| Emotions experienced during bullying | Anticipated guilt before aggression |
|  | Guilt for the suffering caused to another |
|  | Guilt for not helping |
|  | Guilt for not doing the right thing |
|  | Empathic discomfort |
|  | Empathetic anger |
|  | Helplessness in the face of inability to help |
|  | Emotional indifference |
|  | Fear |
|  | Resignation in the face of the impossibility of helping |
| Emotional reactions to the violation of moral norms | Remorse in the face of punishment without real guilt |
|  | Occasional remorse |
|  | Absence of guilt in the context of revenge |
|  | Absence of guilt for harm caused |
|  | Anticipated guilt in the face of aggression |
|  | Guilt for suffering caused to another |
|  | Guilt for not helping |
|  | Guilt for not doing the right thing |
| Empathy facilitators | Empathy amplified by shared experiences |
|  | Empathetic moral reasoning |
|  | Taking the other person's perspective |
| Emotional understanding | Awareness of one's own emotional limits |
|  | Recognition of expressions and causes of emotions |
|  | Recognition of the dissonance between external expression and internal emotion |
| Characteristics of the emotional regulation process | Emotional self-regulation based on self-awareness |
|  | Circumstantial nature of the use of emotional regulation strategies |
|  | Development of emotional self-regulation |
|  | Emotional dysregulation due to inactivity |
|  | Impulsive dysregulation |
| Emotional regulation in the face of guilt | Seeking support as an emotional regulation strategy |
|  | Emotional dysregulation due to inactivity |
|  | Distraction as a regulation strategy in response to guilt |
|  | Attempt to repair the damage to alleviate guilt |
|  | Minimization of the emotional impact on the victim |
| Regulation in response to empathic distress | Distraction as a strategy for regulating empathic distress |
|  | Attempt to repair the suffering of others |
|  | Prosociality motivated by relief from empathic distress |
| Regulation in response to anger | Isolation as a strategy for emotional regulation |
|  | Anticipated emotional dysregulation (anger) |
|  | Dysregulation due to impulsivity |
| Forms of prosociality according to motivations | Help based on the principle of reciprocity |
|  | Selfless help as a moral ideal |
|  | Help motivated by religious beliefs |
|  | Selective help based on connection |
|  | Selective help based on moral judgments |
|  | Altruistic prosocial motivation |
|  | Mixed prosocial motivation |
|  | Prosociality in response to empathic guilt |
|  | Prosociality motivated by relief from empathic distress |
| Limitations to prosociality | Attribution of personal responsibility as justification for not helping |
|  | Selective help based on connection |
|  | Selective help based on moral judgments |
|  | Prosociality inhibited by negative consequences |
|  | Desire to help with perception of inability |
|  | Frustration due to ingratitude for the help provided |
|  | Severity of the situation as a criterion for intervention |
|  | Prosocial intention inhibited by fear |
|  | Rejection of help by the victim |
|  | Resignation in the face of the impossibility of helping |
|  | Restriction of prosociality to those considered worthy of it |

**Note.** Only categories and codes analyzed in this article are included; English labels reflect translated content.
